# Supplementary material
Source: PubMed Central journal article supplement (PMC4285775)

# fmMRI BOLD

# pCASL CBF

DMN

separate  
joint

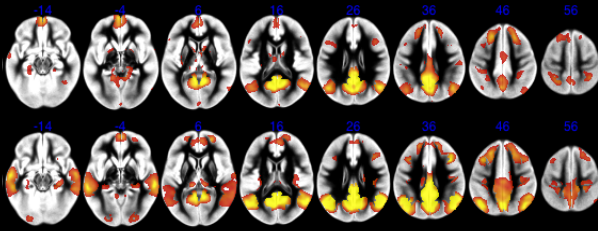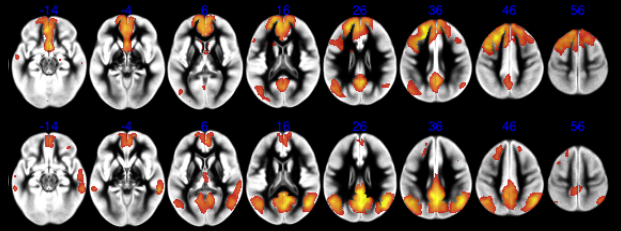

RECN

separate  
joint

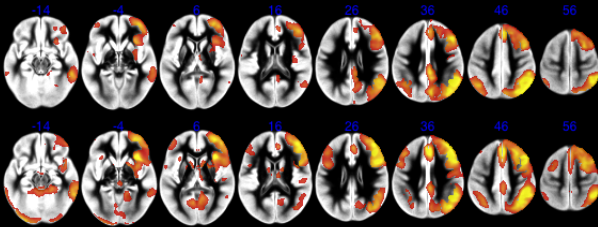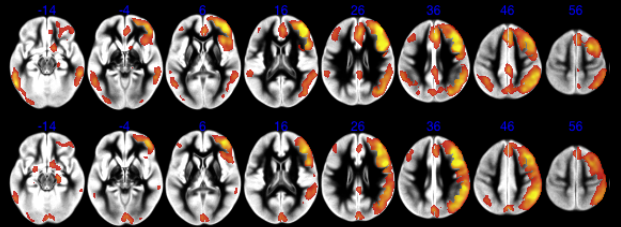

LECN

separate  
joint

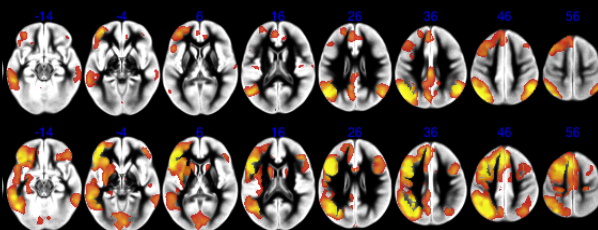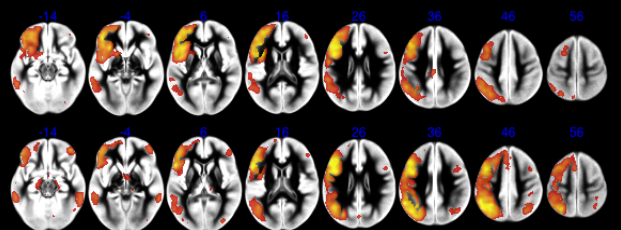

OVN

separate  
joint

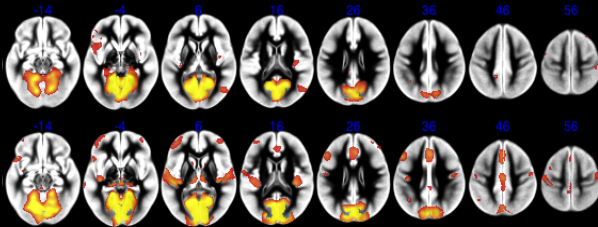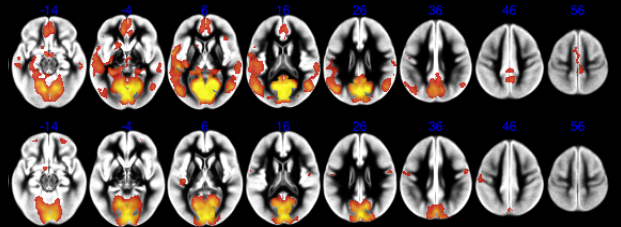

AUN

separate  
joint

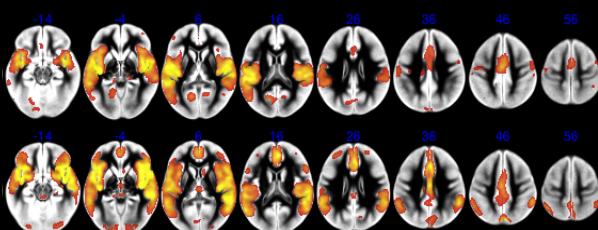

ASL-only ICA did not separate AUN from OVN

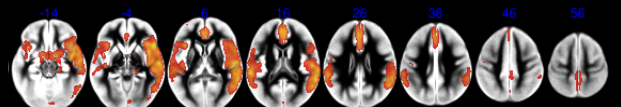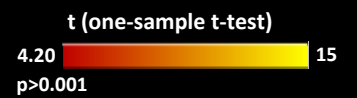

Supplement: NIHMS644019-supplement-1.pdf [file NIHMS644019-supplement-1.pdf]
