# Supplementary material
Source: PubMed Central journal article supplement (PMC4285775)

# fmRI BOLD

ICC 0.8  1

# pCASL CBF

ICC 0.6  1

DMN

within  
between

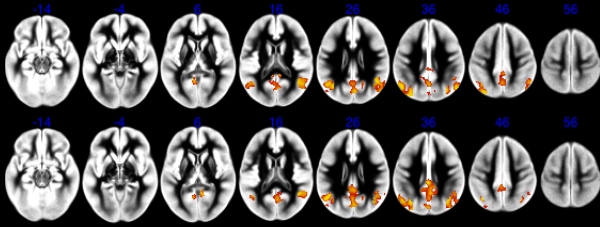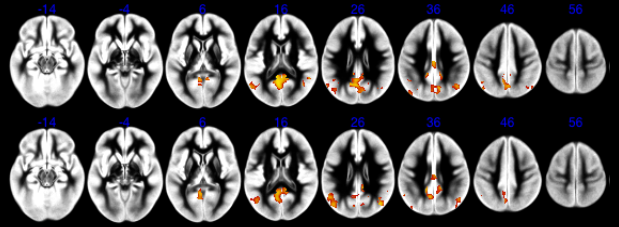

RECN

within  
between

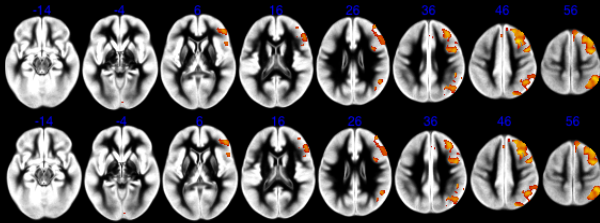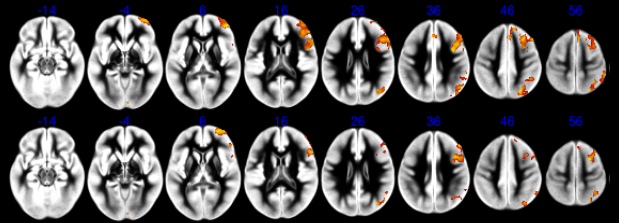

LECN

within  
between

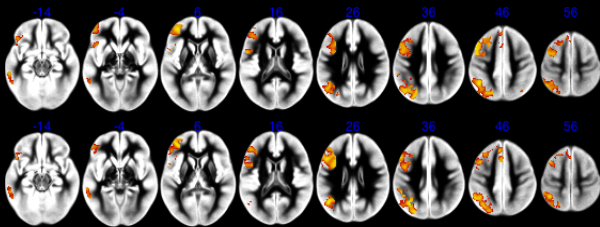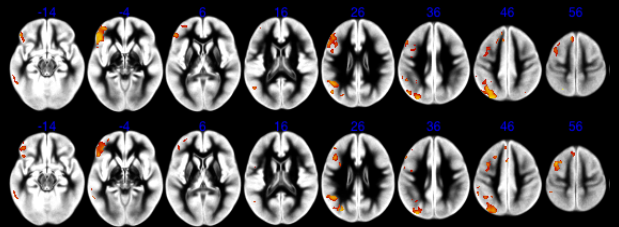

OVN

within  
between

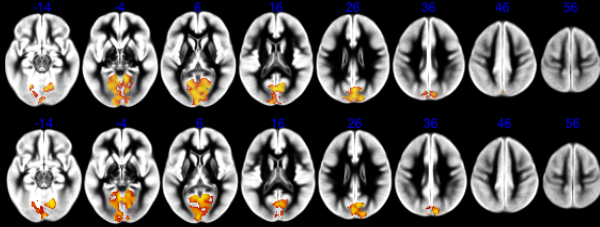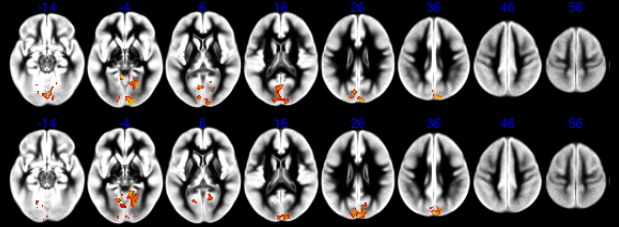

AUN

within  
between

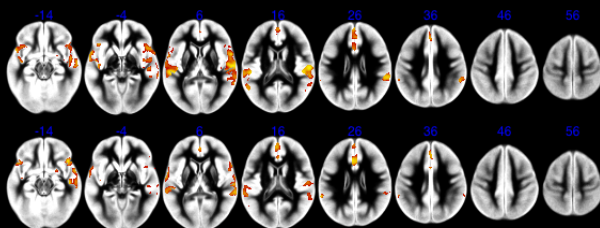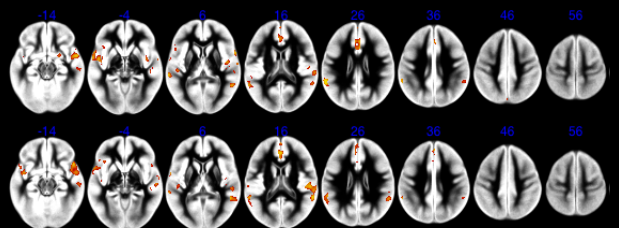

Supplement: NIHMS644019-supplement-3.pdf [file NIHMS644019-supplement-3.pdf]
