# Supplementary material
Source: PubMed Central journal article supplement (PMC4285775)

# Two-sample T-test between BOLD and ASL based RBNs (joint ICA)

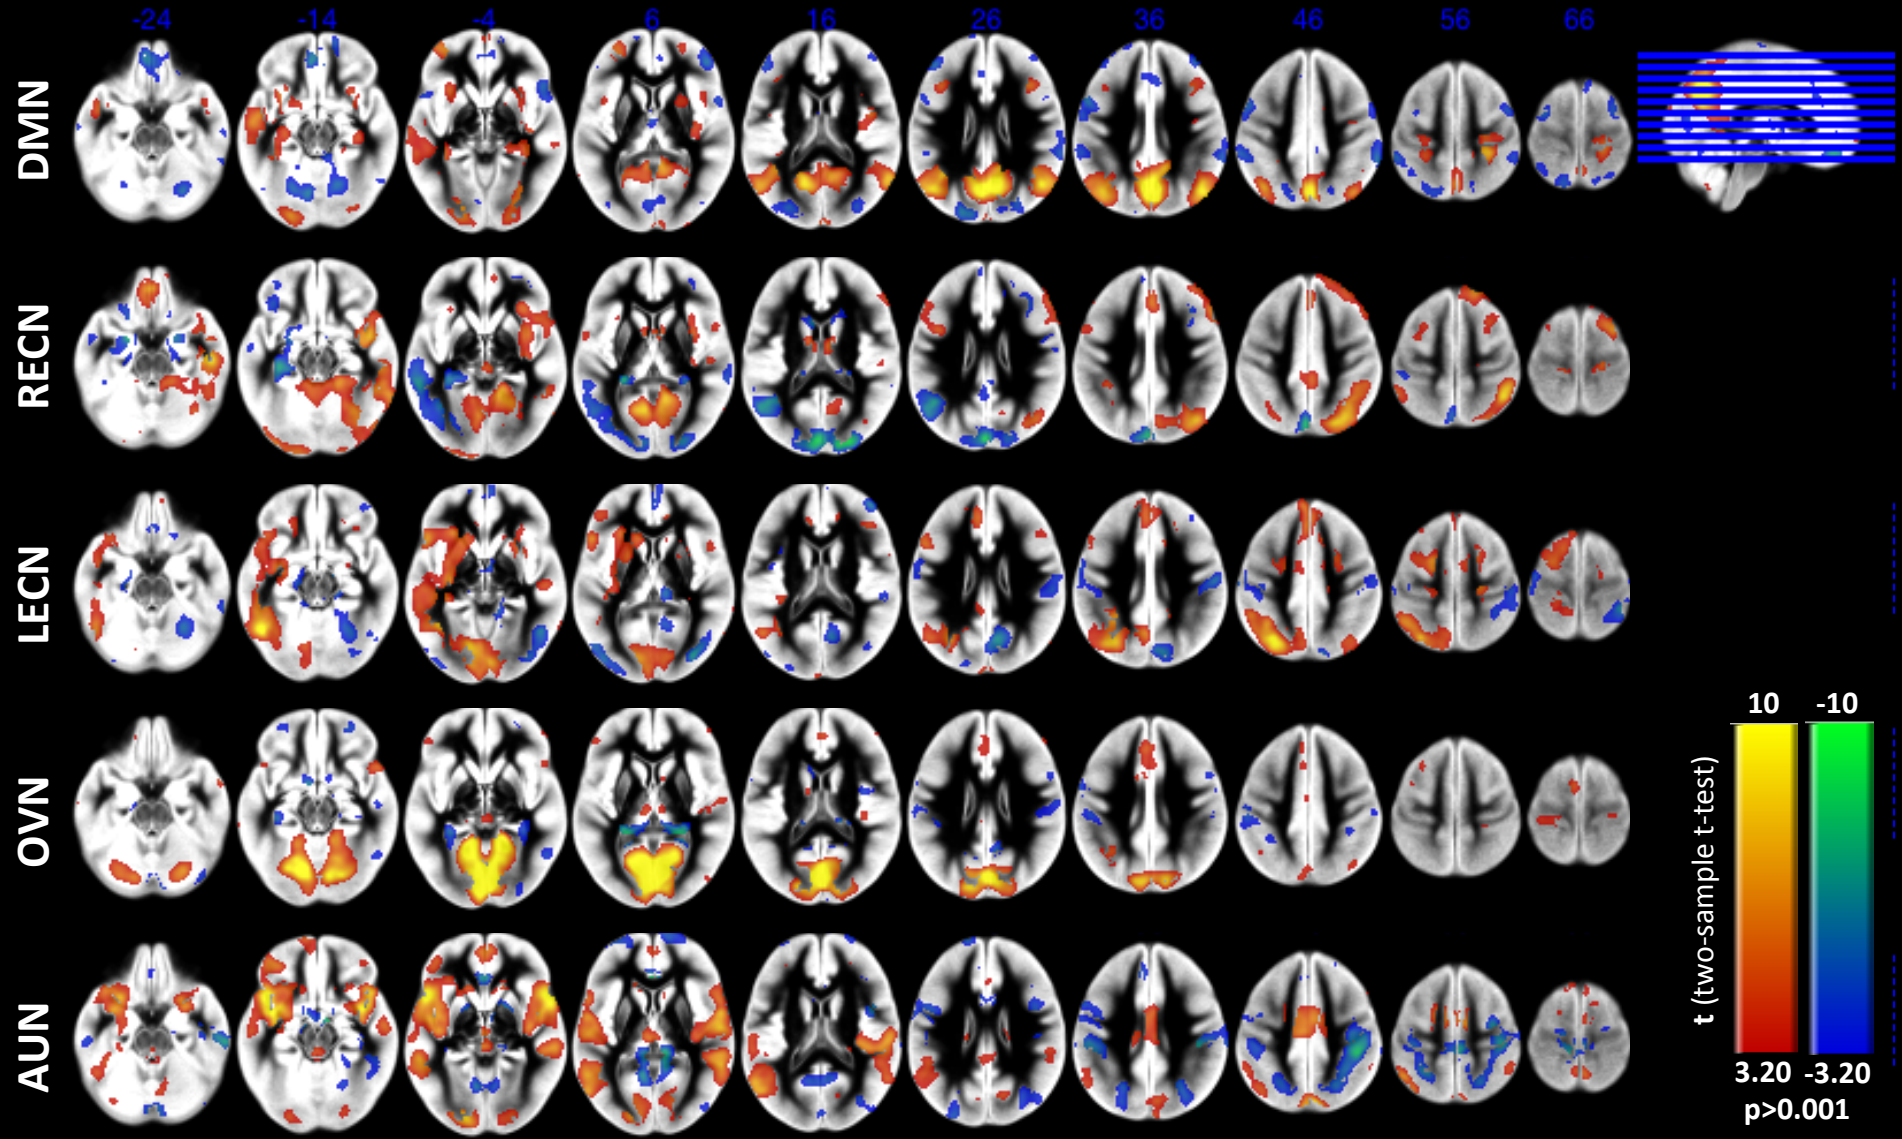

Supplement: NIHMS644019-supplement-4.pdf [file NIHMS644019-supplement-4.pdf]

# fmRI BOLD

# pCASL CBF

DMN

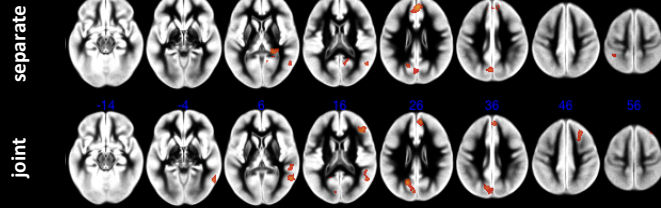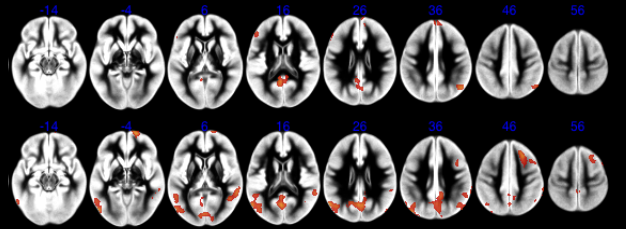

RECN

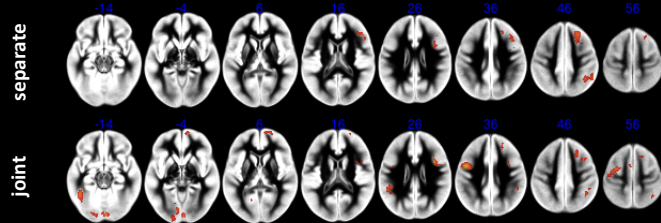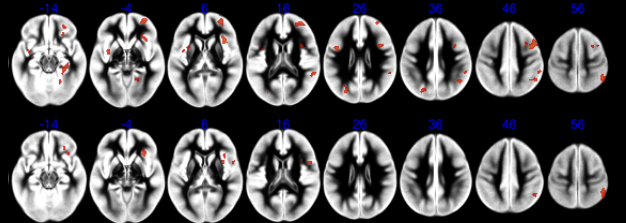

LECN

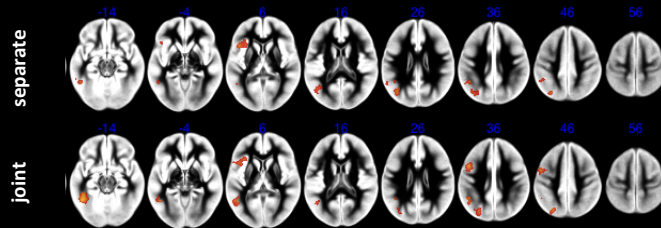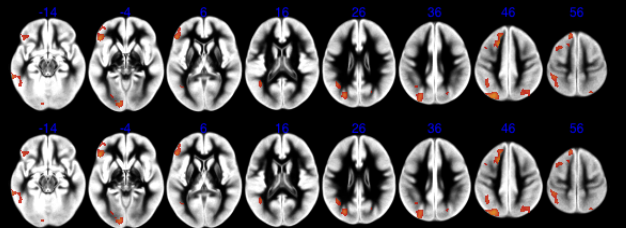

OVN

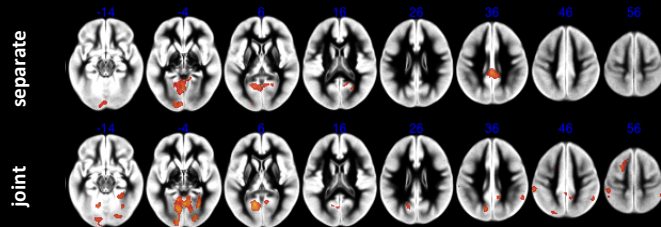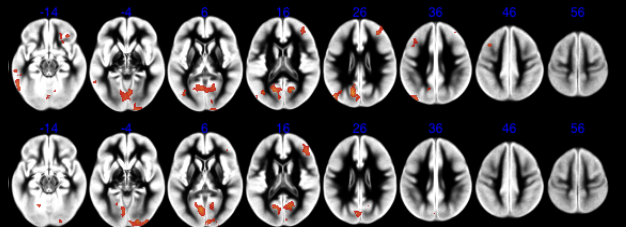

AUN

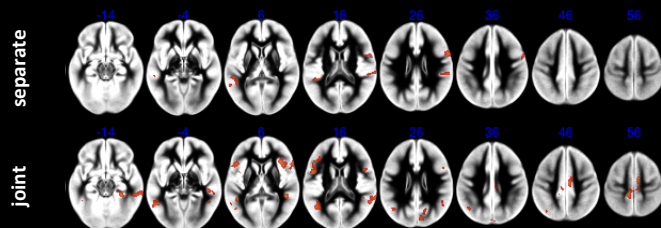

ASL-only ICA did not separate AUN from OVN

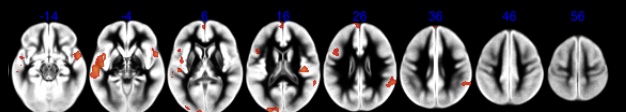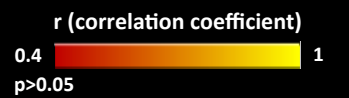

Supplement: NIHMS644019-supplement-5.pdf [file NIHMS644019-supplement-5.pdf]
